# Supplementary material
Source: PubMed Central journal article supplement (PMC4365229)
Supplement: JCM.03591-14_zjm999094149so1.pdf [file JCM.03591-14_zjm999094149so1.pdf]

**Supplemental Table 1.** List of *C. difficile* names, ribotypes, and strain source of strains used in this study.

| Strain name | Ribotype | Strain source                                                           |
|-------------|----------|-------------------------------------------------------------------------|
| DG1846      | F001     | Dale Gerding (Hines VA, Chicago, IL, USA)                               |
| LIV24       | F001     | Trevor Lawley (Wellcome Trust Sanger Institute, Hinxton, Cambridge, UK) |
| CD129       | F001     | University of Michigan Health System (Ann Arbor, MI, USA)               |
| CD92        | F001     | University of Michigan Health System (Ann Arbor, MI, USA)               |
| BI9         | F001     | Trevor Lawley (Wellcome Trust Sanger Institute, Hinxton, Cambridge, UK) |
| CD133       | F002     | University of Michigan Health System (Ann Arbor, MI, USA)               |
| DG931       | F002     | Dale Gerding (Hines VA, Chicago, IL, USA)                               |
| VPI10463    | F003     | ATCC® 43255™                                                            |
| 630         | F012     | ATCC® BAA-1382™                                                         |
| DG1172      | F014-020 | Dale Gerding (Hines VA, Chicago, IL, USA)                               |
| TL176       | F014-020 | Trevor Lawley (Wellcome Trust Sanger Institute, Hinxton, Cambridge, UK) |
| CD109       | F014-020 | University of Michigan Health System (Ann Arbor, MI, USA)               |
| CD111       | F014-020 | University of Michigan Health System (Ann Arbor, MI, USA)               |
| CD90        | F014-020 | University of Michigan Health System (Ann Arbor, MI, USA)               |
| CD211       | F014-020 | University of Michigan Health System (Ann Arbor, MI, USA)               |
| TL174       | F015     | Trevor Lawley (Wellcome Trust Sanger Institute, Hinxton, Cambridge, UK) |
| CD149       | F015     | University of Michigan Health System (Ann Arbor, MI, USA)               |
| CD131       | F015     | University of Michigan Health System (Ann Arbor, MI, USA)               |
| CD166       | F015     | University of Michigan Health System (Ann Arbor, MI, USA)               |
| CD175       | F017     | University of Michigan Health System (Ann Arbor, MI, USA)               |
| DG4241      | F017     | Dale Gerding (Hines VA, Chicago, IL, USA)                               |
| CF5         | F017     | Trevor Lawley (Wellcome Trust Sanger Institute, Hinxton, Cambridge, UK) |
| DA00065     | F017     | University of Michigan Health System (Ann Arbor, MI, USA)               |
| CD305       | F023     | Trevor Lawley (Wellcome Trust Sanger Institute, Hinxton, Cambridge, UK) |
| DG5325      | F027     | Dale Gerding (Hines VA, Chicago, IL, USA)                               |
| R20291      | F027     | Trevor Lawley (Wellcome Trust Sanger Institute, Hinxton, Cambridge, UK) |
| CD196       | F027     | Trevor Lawley (Wellcome Trust Sanger Institute, Hinxton, Cambridge, UK) |
| DG5723      | F053-163 | Dale Gerding (Hines VA, Chicago, IL, USA)                               |
| CD159       | F053-163 | University of Michigan Health System (Ann Arbor, MI, USA)               |
| CD165       | F053-163 | University of Michigan Health System (Ann Arbor, MI, USA)               |

|         |          |                                                                         |
|---------|----------|-------------------------------------------------------------------------|
| M120    | F078-126 | Trevor Lawley (Wellcome Trust Sanger Institute, Hinxton, Cambridge, UK) |
| DG5709  | F078-126 | Dale Gerding (Hines VA, Chicago, IL, USA)                               |
| DG4068  | F106     | Dale Gerding (Hines VA, Chicago, IL, USA)                               |
| DA00215 | FP310    | University of Michigan Health System (Ann Arbor, MI, USA)               |
| F665    | FP310    | University of Michigan Health System (Ann Arbor, MI, USA)               |
| CD104   | FP311    | University of Michigan Health System (Ann Arbor, MI, USA)               |
| CD201   | FP311    | University of Michigan Health System (Ann Arbor, MI, USA)               |
| CD211   | FP312    | University of Michigan Health System (Ann Arbor, MI, USA)               |
| CD34    | FP312    | University of Michigan Health System (Ann Arbor, MI, USA)               |
| F200    | FP312    | University of Michigan Health System (Ann Arbor, MI, USA)               |
| CD3     | FP308    | University of Michigan Health System (Ann Arbor, MI, USA)               |
| DA00126 | FP308    | University of Michigan Health System (Ann Arbor, MI, USA)               |
| CD44    | FP318    | University of Michigan Health System (Ann Arbor, MI, USA)               |
| F321    | FP370    | University of Michigan Health System (Ann Arbor, MI, USA)               |
